# Supplementary material
Source: PubMed Central journal article supplement (PMC2000442)

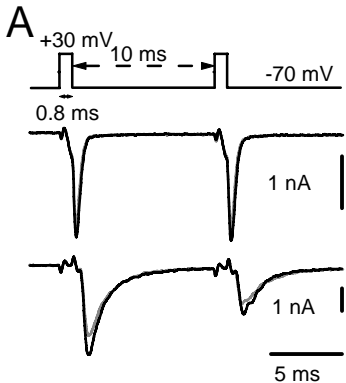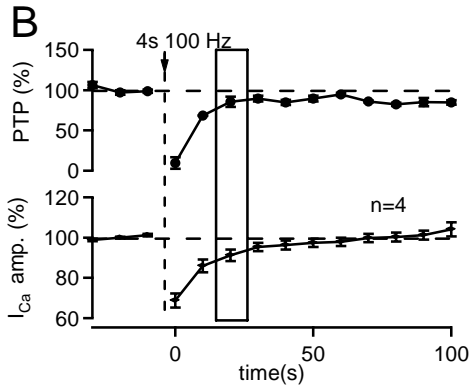

Supplement: pnas_0704603104_1.pdf [file pnas_0704603104_1.pdf]
